# Supplementary material
Source: publisher figshare collection journal article supplement (https://frontiersin.figshare.com/ndownloader/files/33934064)

S3 Raw images of Western Blotting

Figure 2B

1 GAP

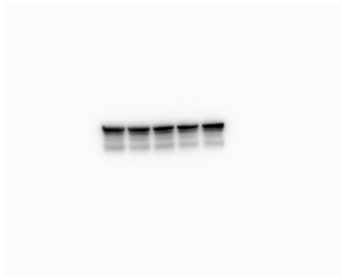

2 LC3

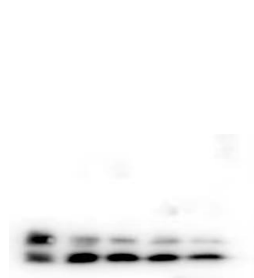

3 ATG7

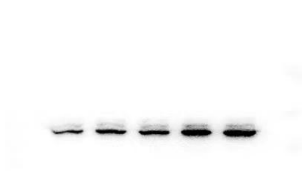

4 P62

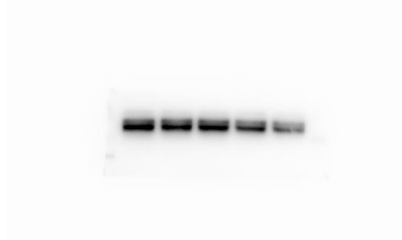

Figure 3I

1 GAP

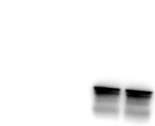

2 ALP

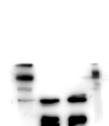

3 OPN

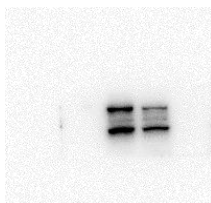

4 RUNX2

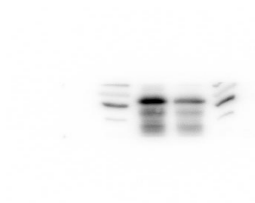

Figure 3J

1 GAP

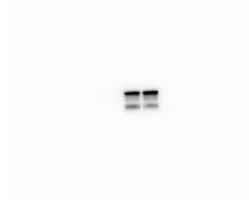

2 ALP

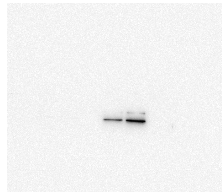

3 OPN

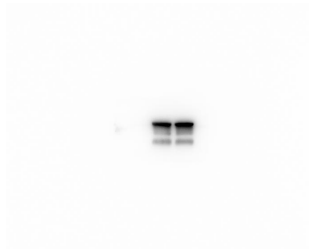

4 RUNX2

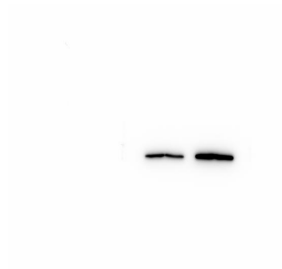

Figure 4

1 GAP

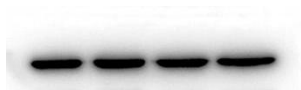

2 LC3

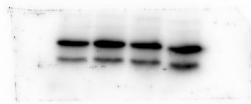

3 ATG7

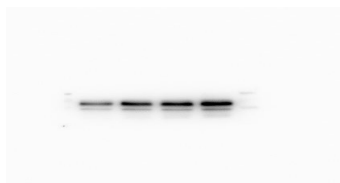

4 P62

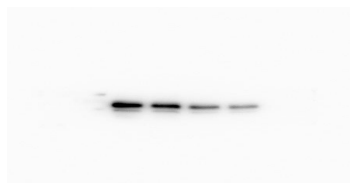

Figure 5

1 GAP

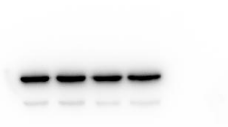

2 FGF23

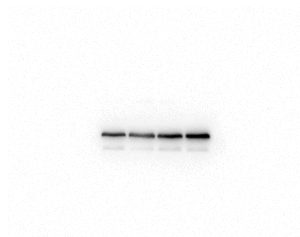

Figure 6A

1 GAP

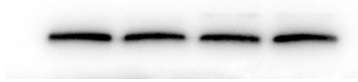

2 CARM1

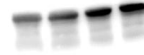

3 AMPK

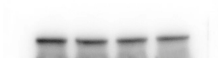

4 pAMPKα

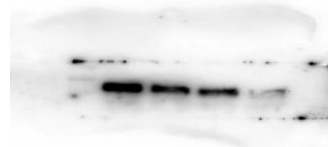

Figure 6B

1 GAP

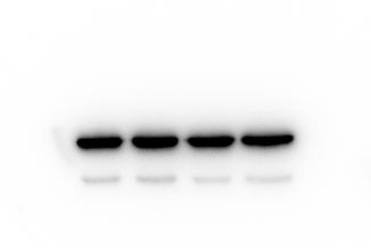

2 LC3B

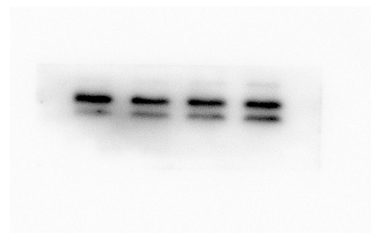

3 CARM1

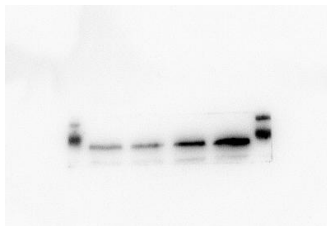

4 P62

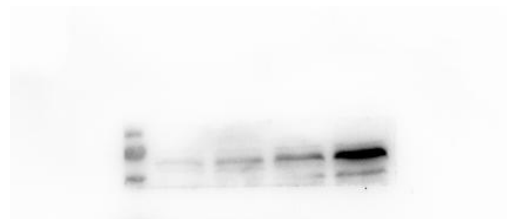

5 AMPKα

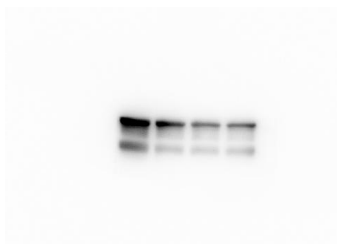

6 pAMPKα

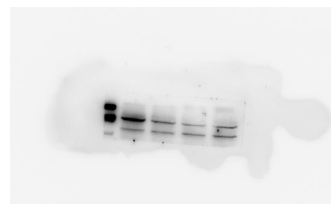

Supplement: Supplementary file [file 33934064]
